# Supplementary material for: Functional Characterization of Sex Pheromone Receptors in the Fall Armyworm (Spodoptera frugiperda)
Source: PubMed Central journal article supplement (PMC7143582; doi:10.3390/insects11030193), 2020-03-18
Supplement: insects-11-00193-s001.pdf [file insects-11-00193-s001.pdf]

## Supplementary Materials

**Table 1.** Primers used in this study.

| Primer name                  | Sequence (5' - 3')                                       |
|------------------------------|----------------------------------------------------------|
| Specific primers for cloning |                                                          |
| SfruOR6-F                    | ATGGGTCTTAAACACTTTCTCTTTGA                               |
| SfruOR6-R                    | TCAAATGCTGCGTAAGAAGGTG                                   |
| SfruOR11-F                   | ATGTTTAGCTTGGACACGTATGCG                                 |
| SfruOR11-R                   | TTAAAATGTACGTAAGAAAGCGAAATAT                             |
| SfruOR13-F                   | ATGGACGACATAAAAATTGTCTACCG                               |
| SfruOR13-R                   | TTATTCTTCCTCGTCGGCGA                                     |
| SfruOR16-F                   | ATGAATCTCAAAAATTCTTTTTCG                                 |
| SfruOR16-R                   | TCACATGCTTCTCAAGAAGGTGA                                  |
| SfruOR56-F                   | ATGGGTTTAAGAAATTTTCTTTTTGG                               |
| SfruOR56-R                   | TCAGATGCTACGTA AAAAGGTGAAA                               |
| SfruOR62-F                   | ATGGGTCTCAAAAATTCTTATTCCG                                |
| SfruOR62-R                   | TCAGATGCTGCGTAAAAACGC                                    |
| SfruORco-F                   | ATGATGACCAAAGTGAAAGCCC                                   |
| SfruORco-R                   | TTACTTGAGCTGTACTAACACCATGAA                              |
| Primers for Real-time PCR    |                                                          |
| SfruOR6-qF                   | TGCTGACCCATACCTTGAC                                      |
| SfruOR6-qR                   | CAGTAACAGCAAACAGCCGC                                     |
| SfruOR11-qF                  | ACGCTGTCTAGGCATCACC                                      |
| SfruOR11-qR                  | TTCTCGCCTAGCGCCTTTCC                                     |
| SfruOR13-qF                  | TACAGCGTGCCCTGGGAGTA                                     |
| SfruOR13-qR                  | TGGTCTGGACACCGACAGTGA                                    |
| SfruOR16-qF                  | TGGGAATGCATGGATGCGAACA                                   |
| SfruOR16-qR                  | TCGCGGCCATAGAAGTGACG                                     |
| SfruOR56-qF                  | GCTCCAGCCCTTATGCGTTA                                     |
| SfruOR56-qR                  | GACGCCGACATTGGCAATAC                                     |
| SfruOR62-qF                  | GAAGTGGGGGCACACAAAAC                                     |
| SfruOR62-qR                  | GCAGAACCAAGTAGCGCAGA                                     |
| SfruRpL32-qF                 | GACCCGTCACATGCTACCCA                                     |
| SfruRpL32-qR                 | GCGCGCTCTACGATGGTCTT                                     |
| Sfru EF1 $\alpha$ -qF        | ACGCTCCCGGACACAGAGAT                                     |
| Sfru EF1 $\alpha$ -qR        | AGCGGCGACAATGAGTACGG                                     |
| Primers for cRNA synthesis   |                                                          |
| SfruOR6-EcoRI-F              | <u>ATTCCCCGGGGATCCGAATTC</u> CATGGGTCTTAAACACTTTCTCTTTGA |
| SfruOR6-XbaI-R               | <u>TCGGCGATCGGGCCCTCTAGAT</u> CAAATGCTGCGTAAGAAGGTG      |
| SfruOR11-EcoRI-F             | <u>ATTCCCCGGGGATCCGAATTC</u> CATGTTTAGCTTGGACACGTATGCG   |
| SfruOR11-XbaI-R              | <u>TCGGCGATCGGGCCCTCTAGAT</u> TAAAATGTACGTAAGAAAGCGAAATA |
| T                            |                                                          |
| SfruOR13-EcoRI-F             | <u>ATTCCCCGGGGATCCGAATTC</u> CATGGACGACATAAAAATTGTCTACCG |
| SfruOR13-XbaI-R              | <u>TCGGCGATCGGGCCCTCTAGAT</u> TATTCTTCCTCGTCGGCGA        |
| SfruOR16-EcoRI-F             | <u>ATTCCCCGGGGATCCGAATTC</u> CATGAATCTCAAAAATTCTTTTTCG   |
| SfruOR16-XbaI-R              | <u>TCGGCGATCGGGCCCTCTAGAT</u> CACATGCTTCTCAAGAAGGTGA     |
| SfruOR56-EcoRI-F             | <u>ATTCCCCGGGGATCCGAATTC</u> CATGGGTTTAAGAAATTTTCTTTTTGG |
| SfruOR56-XbaI-R              | <u>TCGGCGATCGGGCCCTCTAGAT</u> CAGATGCTACGTA AAAAGGTGAAA  |
| SfruOR62-EcoRI-F             | <u>ATTCCCCGGGGATCCGAATTC</u> CATGGGTCTCAAAAATTCTTATTCCG  |
| SfruOR62-XbaI-R              | <u>TCGGCGATCGGGCCCTCTAGAT</u> CAGATGCTGCGTAAAAACGC       |



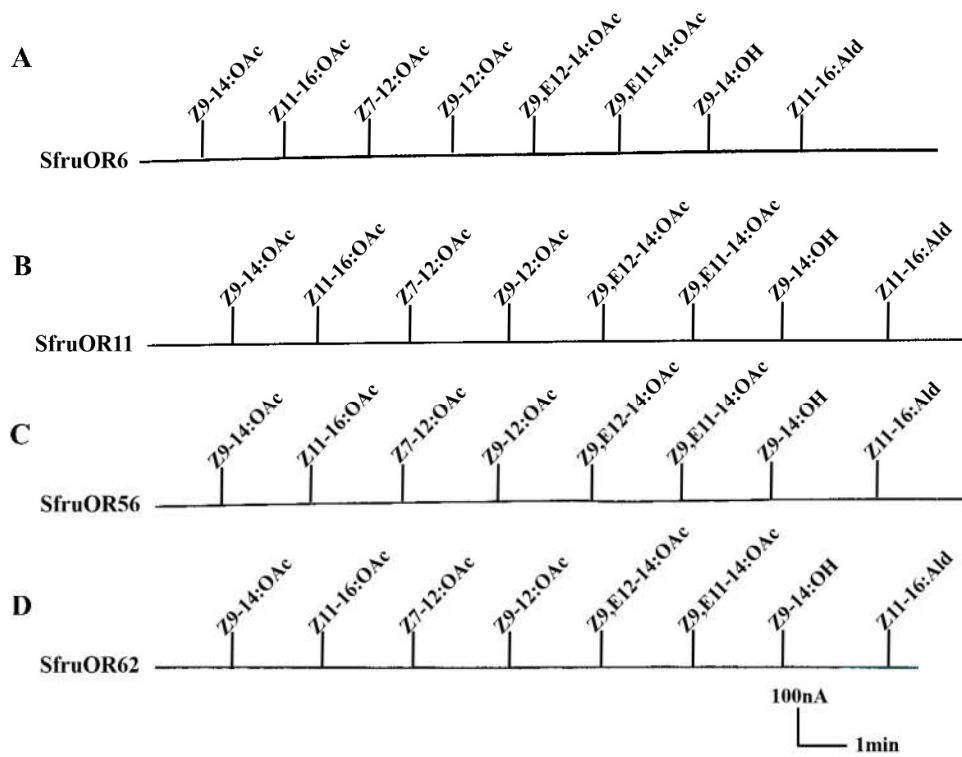

**Figure S2.** Responses of *Xenopus* oocytes co-expressed with SfruOR6/ORco (A), SfruOR11/ORco (B), SfruOR56/ORco (C) and SfruOR62/ORco (D) to stimulation with pheromone components and analogs ( $10^{-4}$  M).
